# Supplementary material
Source: PubMed Central journal article supplement (PMC5329053)
Supplement: NIHMS819899-supplement-Supplement.pdf [file NIHMS819899-supplement-Supplement.pdf]

## **Supplementary Information**

Soluble Mediators and Clinical Features Discern Risk of Transitioning to Classified Disease in Relatives of Systemic Lupus Erythematosus Patients

Melissa E. Munroe, Kendra A. Young, Diane L. Kamen, Joel M. Guthridge, Timothy B. Niewold, Karen H. Costenbader, Michael H. Weisman, Mariko L. Ishimori, Daniel J. Wallace, Gary S. Gilkeson, David R. Karp, John B. Harley, Jill M. Norris, and Judith A. James

## **Table of Contents**

Page 03

Supplementary Patients and Methods

Page 06

Supplementary Figures

Page 09

Supplementary Tables

Page 12

Supplementary References

## Supplementary Patients and Methods

### *Study Population/Plasma Samples*

Experiments were performed in accordance with the Helsinki Declaration and approved by the Oklahoma Medical Research Foundation (OMRF) and Medical University of South Carolina (MUSC) Institutional Review Boards. Blood relatives of lupus patients meeting < 4 American College of Rheumatology (ACR) SLE classification criteria (1, 2) (n=3645; mean time to follow-up = 8.0 years) previously enrolled in the Lupus Family Registry and Repository (LFRR) (3) or Systemic Lupus Erythematosus in Gullah Health (SLEIGH) study (4) (enrolled in the parent cohorts between 1992 and 2011) were invited by letter to participate in a follow-up study to identify individuals who transitioned to classified SLE (meeting  $\geq 4$  cumulative ACR criteria (1, 2)). Lupus relatives were recruited for the follow-up study between March 2010 and May 2012. Individuals who wished to participate in the study completed a short telephone interview to confirm their eligibility for the study, determine willingness to complete questionnaires and provide blood samples required for the study, and to screen for individuals who potentially met SLE classification criteria. All individuals who consented to this follow-up study (n=409) provided serum and plasma samples at the time of enrollment in the LFRR and SLEIGH studies, as well as this follow-up study, along with demographic and clinical information (3). Samples were stored at  $-20^{\circ}\text{C}$  and assays performed on freshly thawed samples.

Consent to obtain medical records was provided by study participants considered to potentially meet SLE classification criteria during the phone interview. Information regarding cumulative clinical and laboratory features for each case was obtained by chart review and collected on a standard data collection form by a rheumatology-trained physician or nurse. Clinical manifestations evaluated in this protocol were determined according to criteria set by the ACR (1, 2). Stringent documentation requirements were used for review of the medical record. Various levels of evidence were graded as follows: 0 = no evidence, 1 = patient-reported evidence, 2 = physician-reported evidence not confirmed by physical examination findings, and 3 = physician-observed evidence documented in the medical record. All designations used in this study had level 3 evidence. Each ACR criterion was recorded as being either present or absent. The date of occurrence and the presence or absence of each ACR criterion was recorded for each patient.

In addition to questionnaires to obtain demographic, education, socioeconomic, family pedigree, medical history, and medication data, participants completed the SLE-specific portion of the Connective Tissue Disease Screening Questionnaire (CSQ) (5, 6). The CSQ is a 30-item instrument designed to identify individuals with potential connective tissue disease in population studies and includes questions regarding symptoms of SLE, rheumatoid arthritis, scleroderma, mixed connective tissue disease (MCTD), myositis, and Sjögren's syndrome. The SLE portion of the CSQ (SLE-CSQ) was scored using an algorithm based on ACR classification criteria (5). The SLE-CSQ refers to nine criteria from the 1982 revised ACR criteria for SLE: malar rash, discoid rash, photosensitivity, oral ulcers, arthritis, serositis, proteinuria, hematologic disorder (anemia, leukopenia, low platelet count), and positive antinuclear antibody (ANA) titer. In addition, the SLE-CSQ refers to two criteria from the 1971 American Rheumatism Association criteria for SLE (alopecia and Raynaud's phenomenon). The CSQ instrument has been validated in community-based cohorts across multiple ethnicities (5-7).

Study participants who transitioned to classified SLE, meeting  $\geq 4$  cumulative ACR SLE classification criteria at follow-up (n=45) were demographically matched for case-control analysis by age ( $\pm 5$  years), gender, and race to non-transitioned study participants (1:2, 1 individual who transitioned to SLE matched to 1 ANA positive and 1 ANA negative unaffected

participant), as well as to unrelated healthy controls with no family history of SLE from the Oklahoma Immune Cohort (8) (1:1; 1 individual who transitioned matched to 1 control) who had data during the follow-up period. In addition to demographics and relationship to confirmed SLE patients, these matched groups were assessed for ACR criteria, SLE-CSQ scores, SLE-associated autoantibodies, and plasma soluble mediators in order to determine factors that differentiated relatives who transitioned to SLE.

#### *Detection of SLE-associated Autoantibodies*

Serum samples were screened for SLE-associated autoantibodies in OMRF's College of American Pathologists certified Clinical Immunology Laboratory, as previously described.(9) ANAs (HEp-2 cells) and anti-double-stranded DNA (anti-dsDNA by *Crithidia lucilliae*) were measured using indirect immunofluorescence (Inova Diagnostics); a positive result was defined as detection of ANAs at a titer of  $\geq 1:120$  and anti-dsDNA antibodies at a titer of  $\geq 1:30$ . Precipitin levels of autoantibodies directed against Ro/SSA, La/SSB, Sm, nRNP, and ribosomal P were detected by immunodiffusion. Anticardiolipin (aCL) antibodies were measured by enzyme linked immunosorbent assay, with a titer of  $>20$  IgG or  $>20$  IgM units considered positive.

In addition, plasma samples were screened for autoantibody specificities using the BioPlex 2200 multiplex system (Bio-Rad Technologies, Hercules, CA). The BioPlex 2200 ANA kit uses fluorescently dyed magnetic beads for simultaneous detection of 11 autoantibody specificity levels, including reactivity to dsDNA, chromatin, ribosomal P, Ro/SSA, La/SSB, Sm, the Sm/RNP complex, RNP, Scl-70, centromere B, and Jo-1.(9) Autoantibodies to dsDNA, chromatin, Ro/SSA, La/SSB, Sm, Sm/RNP complex, and RNP were used for analysis in the current study. Anti-dsDNA (IU/mL) has a previously determined positive cutoff of 10 IU/mL; an Antibody Index (AI) value (range 0-8) is reported by the manufacturer to reflect the fluorescence intensity of each of the other autoantibody specificities with a positive cutoff as AI=1.0. The AI scale is standardized relative to calibrators and control samples provided by the manufacturer.

#### *Detection of Soluble Plasma Mediators*

Plasma levels of BlyS (R&D Systems, Minneapolis, MN) and APRIL (eBioscience/Affymetrix, San Diego, CA) were determined by enzyme-linked immunosorbent assay (ELISA), per the manufacturer protocol. An additional fifty analytes, including innate and adaptive cytokines, chemokines, and soluble TNFR superrelatives (appendix p 5), were assessed by xMAP multiplex assays (Panomics/Affymetrix, Santa Clara, CA).(10)

Data were analyzed on the Bio-Rad BioPlex 200<sup>®</sup> array system (Bio-Rad Technologies, Hercules, CA), with a lower boundary of 100 beads per analyte per sample. Median fluorescence intensity for each analyte was interpolated from 5-parameter logistic nonlinear regression standard curves. Analytes below the detection limit were assigned a value of 0.001 pg/mL. A known control serum was included on each plate (Cellgro human AB serum, Cat#2931949, L/N#M1016). Well-specific validity was assessed by AssayCheX<sup>™</sup> QC microspheres (Radix BioSolutions, Georgetown, TX, USA) to evaluate non-specific binding. Mean inter-assay coefficient of variance (CV) of multiplexed bead-based assays for cytokine detection has previously been shown to be 10-14%,(11, 12) and a similar average CV (11%) was obtained across the analytes in this assay using healthy control serum. Intra-assay precision of duplicate wells averaged  $<10\%$  CV in each 25-plex assay.

### *Statistical Analyses*

Relatives who transitioned to classified SLE at follow-up were compared to non-transitioned relatives at baseline (pre-transition) and follow-up (post-transition). Chi-square or Fisher's exact test were used, as appropriate, to determine differences in gender, race, and familial relationship, as well as the presence of ACR criteria and lupus-associated autoantibody specificities, with Bonferroni adjusted p-values. Age differences were assessed by unpaired *t*-test with Welch's correction. Number of ACR criteria (ACR scores), SLE-CSQ scores, ANA titers, number of autoantibody specificities, and plasma soluble mediator levels were compared by Mann-Whitney test. Correlations between plasma soluble mediator levels and SLE-CSQ or ACR score were determined by Spearman rank correlation.

Differentiation modeling analyses were carried out in SAS version 9.3 (Cary, N.C.). The dataset was randomly split 2:1 into test and validation datasets. Generalized estimating equations (GEE), adjusting for correlation within families, were used to assess associations between demographic and familial factors, ACR scores, SLE-CSQ scores, and serology (autoantibody positivity and soluble mediators) at baseline and relatives who transitioned to classified SLE or remained unaffected at follow-up in the test dataset; the models were subsequently run in the validation dataset to determine how well they forecast previously unaffected relatives transitioning to SLE. Odds ratios were determined per 1 standard deviation change in soluble mediator level. The standard deviations of SCF and TGF- $\beta$  were 329.2 and 105.2, respectively. GEE models were initially adjusted for age, gender, ethnicity, relationship to SLE patient, and ANA positivity at baseline (Base Model). Soluble mediators were then added as covariates to these models. Soluble mediators remained in the model if they were statistically significant ( $p < 0.05$ ). In addition, the effect of soluble mediators without ACR score and SLE-CSQ score was assessed. Receiver Operating Characteristic (ROC) curves were produced for each multivariable model in the test and validation datasets using transitioning to SLE as the outcome to determine goodness of fit. Area under the curve (AUC) was determined as the probability of concordance. Positive (LR+) and negative (LR-) likelihood ratios, as well as positive (PPV) and negative (NPV) predictive value were calculated utilizing the pre-test probability of transitioning to classified SLE = 11% (transition rate of this follow-up cohort) and the sensitivity and specificity of each of the GEE models in the test and validation datasets.

Supplementary Figures

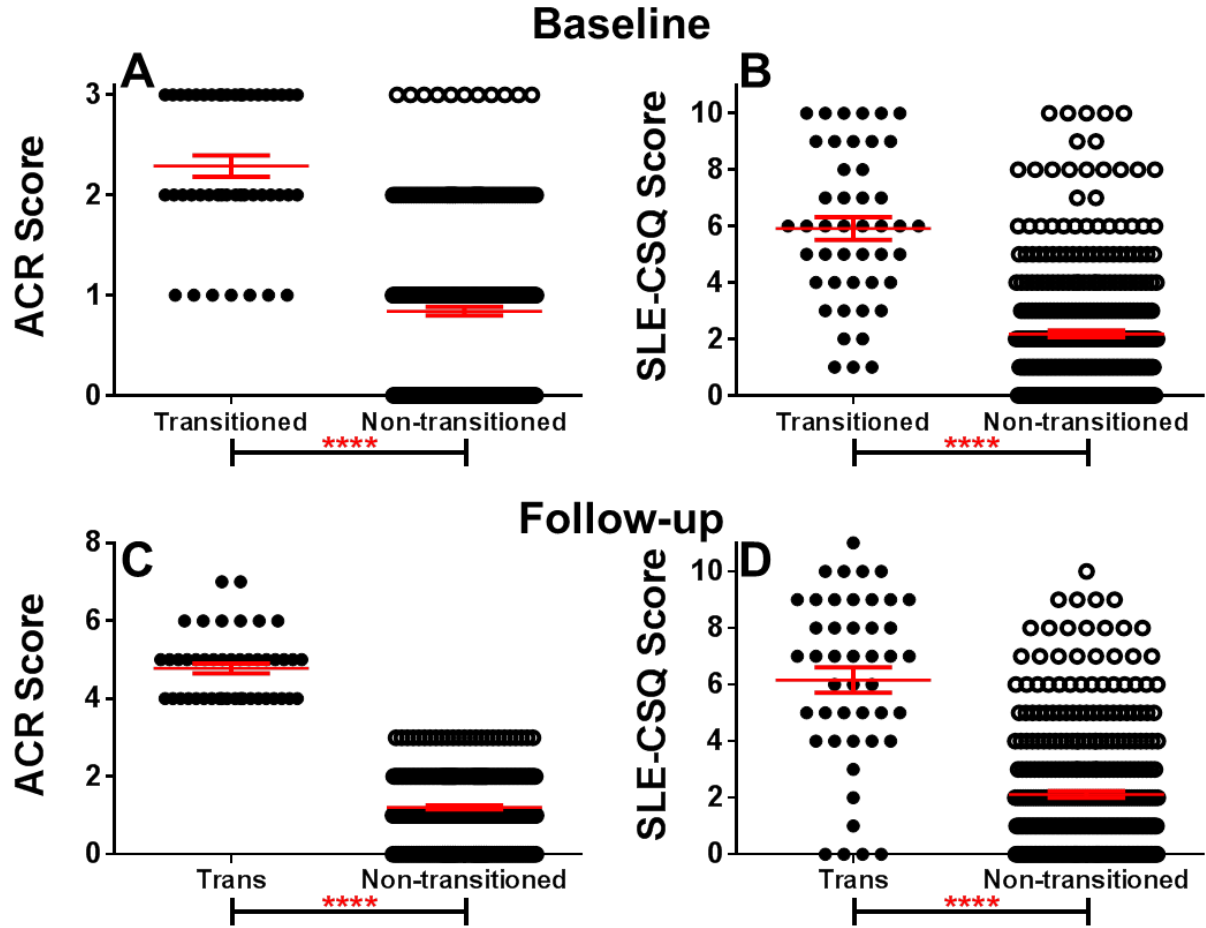

**Supplementary Figure 1.** Altered ACR and SLE-CSQ scores in relatives who transition to classified SLE. Baseline ACR (A) and SLE-CSQ (B) scores in 45 relatives who transitioned to classified SLE at follow-up (Trans) vs. 364 relatives who remained unaffected (Non-transitioned). Follow-up ACR (C) and SLE-CSQ (D) scores in 45 Trans vs. 364 Non-transitioned relatives. Mean  $\pm$  SEM. \*\*\*\*  $p < 0.0001$  by Mann-Whitney.

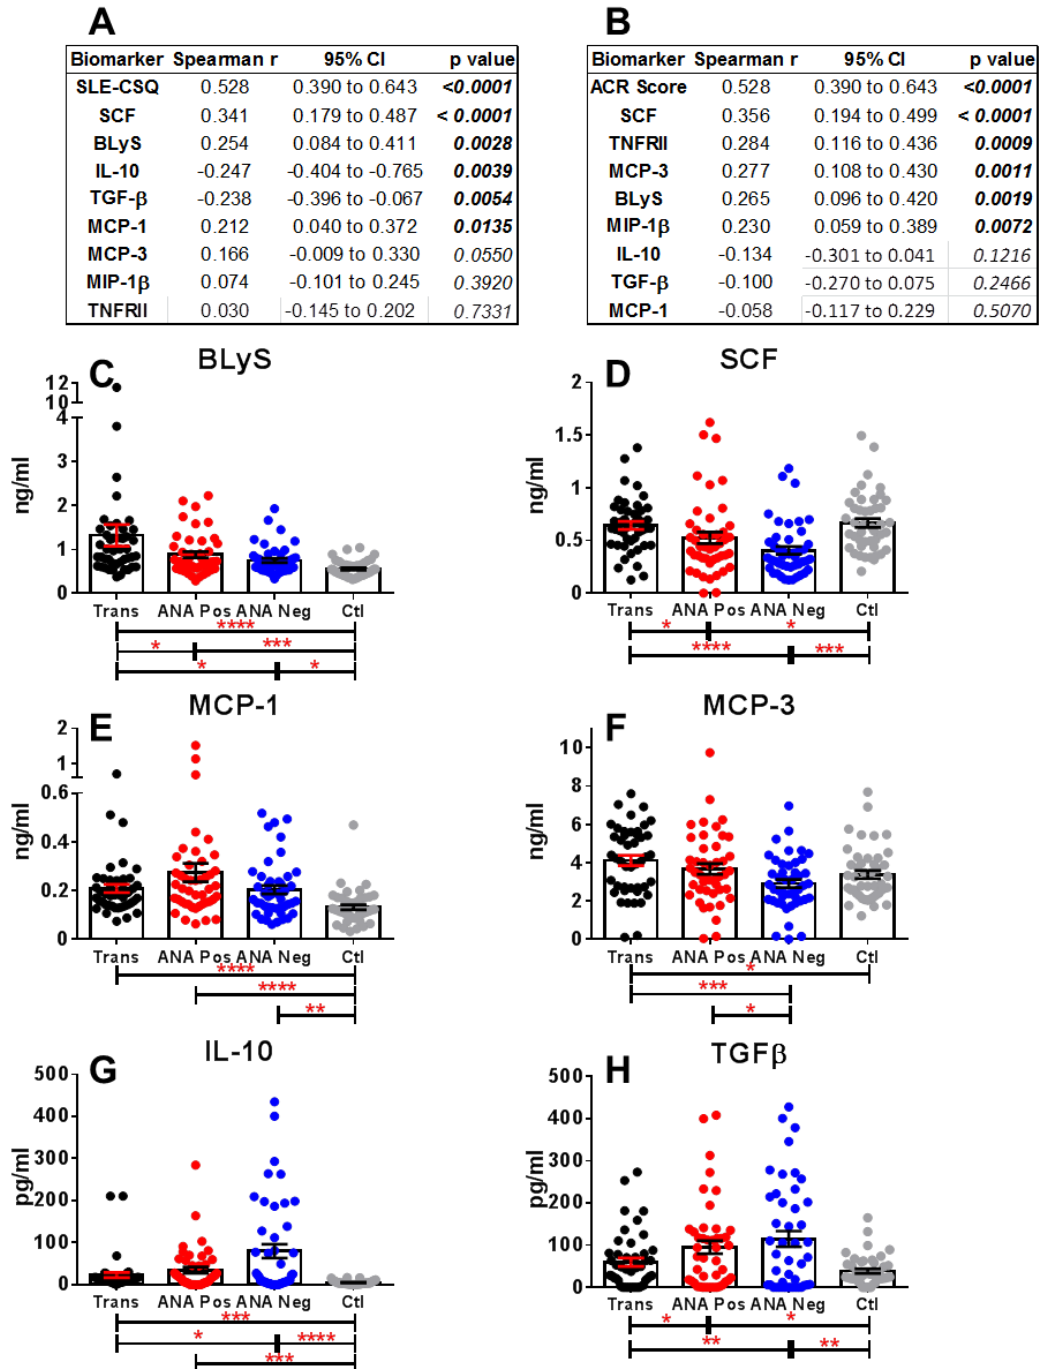

**Supplementary Figure 2.** Altered soluble mediators of inflammation in relatives who transition to classified SLE at follow-up. Spearman correlation of SLE-CSQ scores and plasma soluble mediator levels vs. ACR scores at follow-up are presented (A). Spearman correlation of ACR scores and plasma soluble mediators vs SLE-CSQ scores at follow-up are presented (B). Plasma levels of BLyS (C), SCF (D), MCP-1 (E), MCP-3 (F), IL-10 (G), and TGF $\beta$  (H) were measured at followup in 45 SLE who transitioned to classified SLE (Trans) vs. age ( $\pm 5$  years), race, gender, and time of sample procurement matched non-transitioned relatives who were ANA<sup>+</sup> (ANA Pos) or ANA<sup>-</sup> (ANA Neg) by IIF, as well as to unrelated healthy controls (Ctl) with no family history of SLE. Mean  $\pm$  SEM. \*\*\*\*p<0.0001; \*\*\*p<0.001; \*\*p<0.01; \*p<0.05 by Kruskal-Wallis with Dunn's multiple comparison.

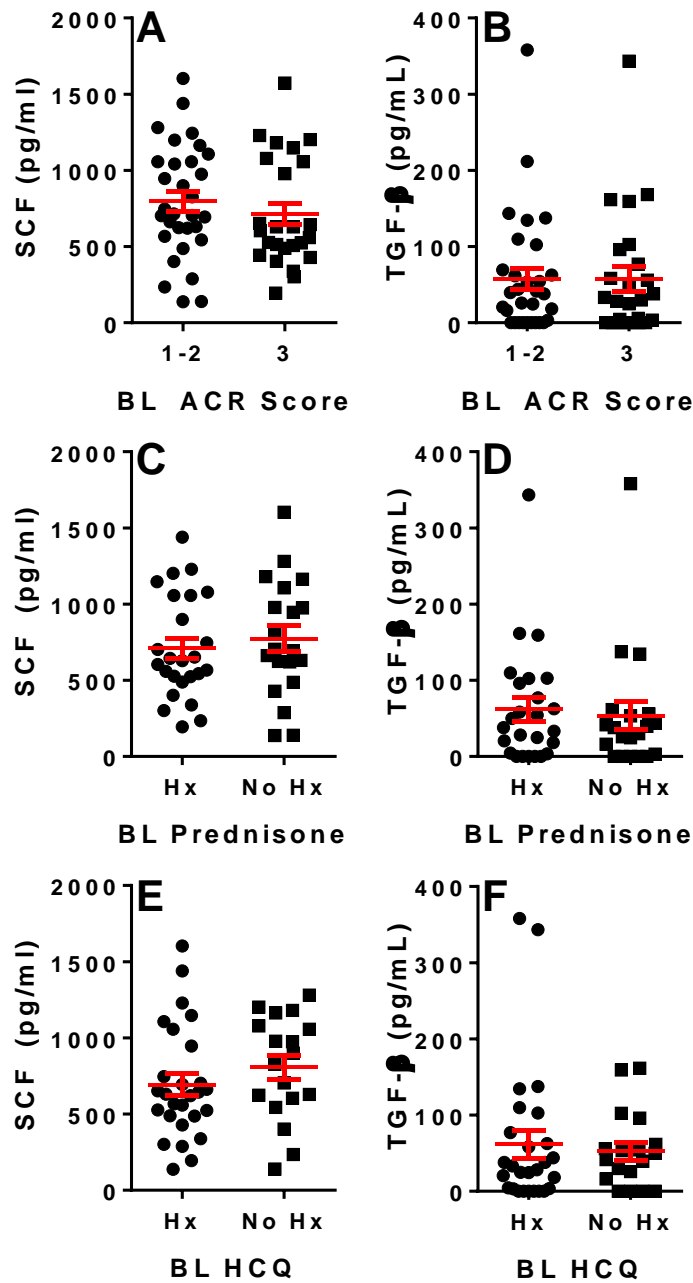

**Supplementary Figure 3.** No difference in baseline SCF and TGF- $\beta$  levels by ACR score or medication use in relatives who transition to classified SLE. Baseline plasma levels of SCF (A, C, E) and TGF- $\beta$  (B, D, F) in 45 relatives who transitioned to classified SLE at follow-up. A-B. Transitioned relatives meeting 1-2 ACR criteria for SLE at baseline (BL) were compared to transitioned relatives meeting 3 ACR criteria for SLE at BL (ACR Score). Transitioned relatives with history (Hx) vs. no Hx at BL for prednisone (C-D) or hydroxychloroquine (HCQ, E-F) were compared. Mean  $\pm$  SEM. *n.s.* by Mann-Whitney test.



## Supplementary Tables

Supplementary Table 1. Plasma soluble mediators tested

| Innate        | Th1 associated  | NGF/TNFR Superfamily         |
|---------------|-----------------|------------------------------|
| IL-1 $\alpha$ | IL-12 (p70)     | BLyS*                        |
| IL-1 $\beta$  | IFN- $\gamma$   | APRIL*                       |
| IL-1RA        | IL-2            | sCD40L                       |
| IFN- $\alpha$ | IL-2RA          | sFas                         |
| IFN- $\beta$  |                 | sFasL                        |
| G-CSF         | Th17 associated | TNF- $\alpha$                |
|               | IL-6            | TNFR1 (p55)                  |
| Homeostasis   | IL-23           | TNFR2 (p75)                  |
| IL-7          | IL-17A          | TRAIL                        |
| IL-15         | IL-21           | NGF $\beta$                  |
| Other         | Th2 associated  | Chemokine/Adhesion molecules |
| LIF           | IL-4            | IL-8/CXCL8                   |
| PAI-1         | IL-5            | IP-10/CXCL10                 |
| PDGF-BB       | IL-13           | RANTES/CCL5                  |
| Resistin      |                 | MIP-1 $\alpha$ /CCL3         |
| Leptin        | Regulatory      | MIP-1 $\beta$ /CCL4          |
| SCF           | IL-10           | MCP-1/CCL2                   |
|               | TGF- $\beta$    | MCP-3/CCL7                   |
|               |                 | GRO $\alpha$ /CXCL1          |
|               |                 | SDF-1/CXCL12                 |
|               |                 | MIG/CXCL9                    |
|               |                 | Eotaxin/CCL11                |
|               |                 | ICAM-1                       |
|               |                 | VCAM-1                       |
|               |                 | sE-selectin                  |
|               |                 | VEGF-A                       |

\*assessed by ELISA

**Supplementary Table 2. Frequency of Lupus Relatives**

| SLE Patients in Pedigree | Non-transitioned | Transitioned | Non-transitioned Matched to Transitioned to SLE <sup>a</sup> |              |
|--------------------------|------------------|--------------|--------------------------------------------------------------|--------------|
|                          |                  |              | ANA Positive                                                 | ANA Negative |
| 1                        | 228 (63%)        | 27 (60%)     | 27 (60%)                                                     | 29 (64%)     |
| 2                        | 94 (26%)         | 15 (33%)     | 14 (31%)                                                     | 11 (24%)     |
| 3                        | 25 (7%)          | 2 (5%)       | 2 (5%)                                                       | 3 (7%)       |
| 4                        | 9 (2%)           | 1 (2%)       | 1 (2%)                                                       | 2 (5%)       |
| 5                        | 8 (2%)           | 0            | 1 (2%)                                                       | 0            |
| <b>Total</b>             | 364              | 45           | 45                                                           | 45           |

<sup>a</sup>ANA Positive and ANA negative (determined by IIF, titer  $\geq$  120) Non-transitioned relatives matched to Transitioned to SLE group by race, gender, and age ( $\pm$  5 years)

**Supplementary Table 3. Autoantibodies in Non-transitioned Relatives vs. Relatives Who Transition to SLE**

| Baseline             | Non-transitioned<br>(n=364) |            | Transitioned<br>(n=45) |            | <i>p-value</i> <sup>a</sup> |
|----------------------|-----------------------------|------------|------------------------|------------|-----------------------------|
|                      | Median                      | IQR        | Median                 | IQR        |                             |
| <b>ANA titer</b>     | 40                          | 0-320      | 360                    | 80-1080    | <b>&lt;0.0001</b>           |
| <b># AutoAbs</b>     | <b>Mean</b>                 | <b>SD</b>  | <b>Mean</b>            | <b>SD</b>  | <i>p-value</i> <sup>a</sup> |
|                      | 0.30                        | 0.67       | 0.84                   | 1.07       | <b>&lt;0.0001</b>           |
| <b>Specificities</b> | <b>n</b>                    | <b>%</b>   | <b>n</b>               | <b>%</b>   | <i>p-value</i> <sup>b</sup> |
| <b>anti-dsDNA</b>    | 9                           | 2.5%       | 5                      | 11%        | 0.0121                      |
| <b>anti-Ro/SSA</b>   | 28                          | 7.7%       | 12                     | 27%        | <b>0.0004</b>               |
| <b>anti-La/SSB</b>   | 14                          | 3.8%       | 6                      | 13%        | 0.0150                      |
| <b>anti-Sm</b>       | 1                           | 0.3%       | 1                      | 2.2%       | 0.2082                      |
| <b>anti-SmRNP</b>    | 7                           | 1.9%       | 2                      | 4.4%       | 0.2595                      |
| <b>anti-nRNP</b>     | 8                           | 2.2%       | 6                      | 13%        | <b>0.0020</b>               |
| <b>Follow-up</b>     |                             |            |                        |            |                             |
| <b>ANA titer</b>     | <b>Median</b>               | <b>IQR</b> | <b>Median</b>          | <b>IQR</b> | <i>p-value</i> <sup>a</sup> |
|                      | 120                         | 0-360      | 120                    | 80-1080    | <b>0.0007</b>               |
| <b># AutoAbs</b>     | <b>Mean</b>                 | <b>SD</b>  | <b>Mean</b>            | <b>SD</b>  | <i>p-value</i> <sup>a</sup> |
|                      | 0.23                        | 0.60       | 0.78                   | 1.06       | <b>&lt;0.0001</b>           |
| <b>Specificities</b> | <b>n</b>                    | <b>%</b>   | <b>n</b>               | <b>%</b>   | <i>p-value</i> <sup>b</sup> |
| <b>anti-dsDNA</b>    | 12                          | 3.3%       | 3                      | 6.7%       | 0.2215                      |
| <b>anti-Ro/SSA</b>   | 33                          | 9%         | 13                     | 29%        | <b>0.0004</b>               |
| <b>anti-La/SSB</b>   | 13                          | 3.6%       | 6                      | 13%        | 0.0114                      |
| <b>anti-Sm</b>       | 1                           | 0.3%       | 1                      | 2.2%       | 0.2082                      |
| <b>anti-SmRNP</b>    | 8                           | 2.2%       | 4                      | 8.9%       | 0.0328                      |
| <b>anti-nRNP</b>     | 10                          | 2.7%       | 4                      | 8.9%       | 0.0562                      |

<sup>a</sup>Mann-Whitney test

<sup>b</sup>Fisher's exact test; Bonferroni-adjusted *p-value* significance for multiple comparisons is 0.0071

## Supplementary References

1. Tan EM, Cohen AS, Fries JF, Masi AT, McShane DJ, Rothfield NF, et al. The 1982 revised criteria for the classification of systemic lupus erythematosus. *Arthritis Rheum* 1982;25(11):1271-7.
2. Hochberg MC. Updating the American College of Rheumatology revised criteria for the classification of systemic lupus erythematosus. *Arthritis Rheum* 1997;40(9):1725.
3. Rasmussen A, Sevier S, Kelly JA, Glenn SB, Aberle T, Cooney CM, et al. The lupus family registry and repository. *Rheumatology (Oxford)* 2011;50(1):47-59.
4. Kamen DL, Barron M, Parker TM, Shaftman SR, Bruner GR, Aberle T, et al. Autoantibody prevalence and lupus characteristics in a unique African American population. *Arthritis Rheum* 2008;58(5):1237-47.
5. Karlson EW, Sanchez-Guerrero J, Wright EA, Lew RA, Daltroy LH, Katz JN, et al. A connective tissue disease screening questionnaire for population studies. *Ann Epidemiol* 1995;5(4):297-302.
6. Walitt BT, Constantinescu F, Katz JD, Weinstein A, Wang H, Hernandez RK, et al. Validation of self-report of rheumatoid arthritis and systemic lupus erythematosus: The Women's Health Initiative. *J Rheumatol* 2008;35(5):811-8.
7. Karlson EW, Costenbader KH, McAlindon TE, Massarotti EM, Fitzgerald LM, Jajoo R, et al. High sensitivity, specificity and predictive value of the Connective Tissue Disease Screening Questionnaire among urban African-American women. *Lupus* 2005;14(10):832-6.
8. Ritterhouse LL, Lu R, Shah HB, Robertson JM, Fife DA, Maecker HT, et al. Vitamin d deficiency in a multiethnic healthy control cohort and altered immune response in vitamin d deficient European-american healthy controls. *PLoS One* 2014;9(4):e94500.
9. Bruner BF, Guthridge JM, Lu R, Vidal G, Kelly JA, Robertson JM, et al. Comparison of autoantibody specificities between traditional and bead-based assays in a large, diverse collection of patients with systemic lupus erythematosus and family members. *Arthritis Rheum* 2012;64(11):3677-86.
10. Munroe ME, Vista ES, Guthridge JM, Thompson LF, Merrill JT, James JA. Pro-inflammatory adaptive cytokines and shed tumor necrosis factor receptors are elevated preceding systemic lupus erythematosus disease flare. *Arthritis Rheumatol* 2014;66(7):1888-99.
11. Dupont NC, Wang K, Wadhwa PD, Culhane JF, Nelson EL. Validation and comparison of luminex multiplex cytokine analysis kits with ELISA: determinations of a panel of nine cytokines in clinical sample culture supernatants. *J Reprod Immunol* 2005;66(2):175-91.
12. Dossus L, Becker S, Achaintre D, Kaaks R, Rinaldi S. Validity of multiplex-based assays for cytokine measurements in serum and plasma from "non-diseased" subjects: comparison with ELISA. *J Immunol Methods* 2009;350(1-2):125-32.
